# Supplementary material for: Oxygen vacancy ordering in SrFe0.25Co0.75O2.63perovskite material
Source: Royal Society of Chemistry journal article supplement (doi:10.1039/c6dt03927h), 2017-01-01
Supplement: c6dt03927h1.pdf [file c6dt03927h1.pdf]

| Atom  | Wickoff position | x    | y    | z    | Biso(Å <sup>2</sup> ) | Occ. |
|-------|------------------|------|------|------|-----------------------|------|
| Sr    | 1a               | 0.00 | 0.00 | 0.00 | 0.63(4)               | 1    |
| Co/Fe | 1b               | 0.50 | 0.50 | 0.50 | 0.69(6)               | 1    |
| O     | 3c               | 0.50 | 0.00 | 0.50 | 0.5                   | 2.63 |

**Table S1.** Structural parameters obtained by the Rietveld's refinement of the x-ray powder diffraction data using the cubic *Pm-3m* space group. Occupation factors were fixed to the structural formula values. Fe and Co cations could not be distinguished because of their similar scattering factors.

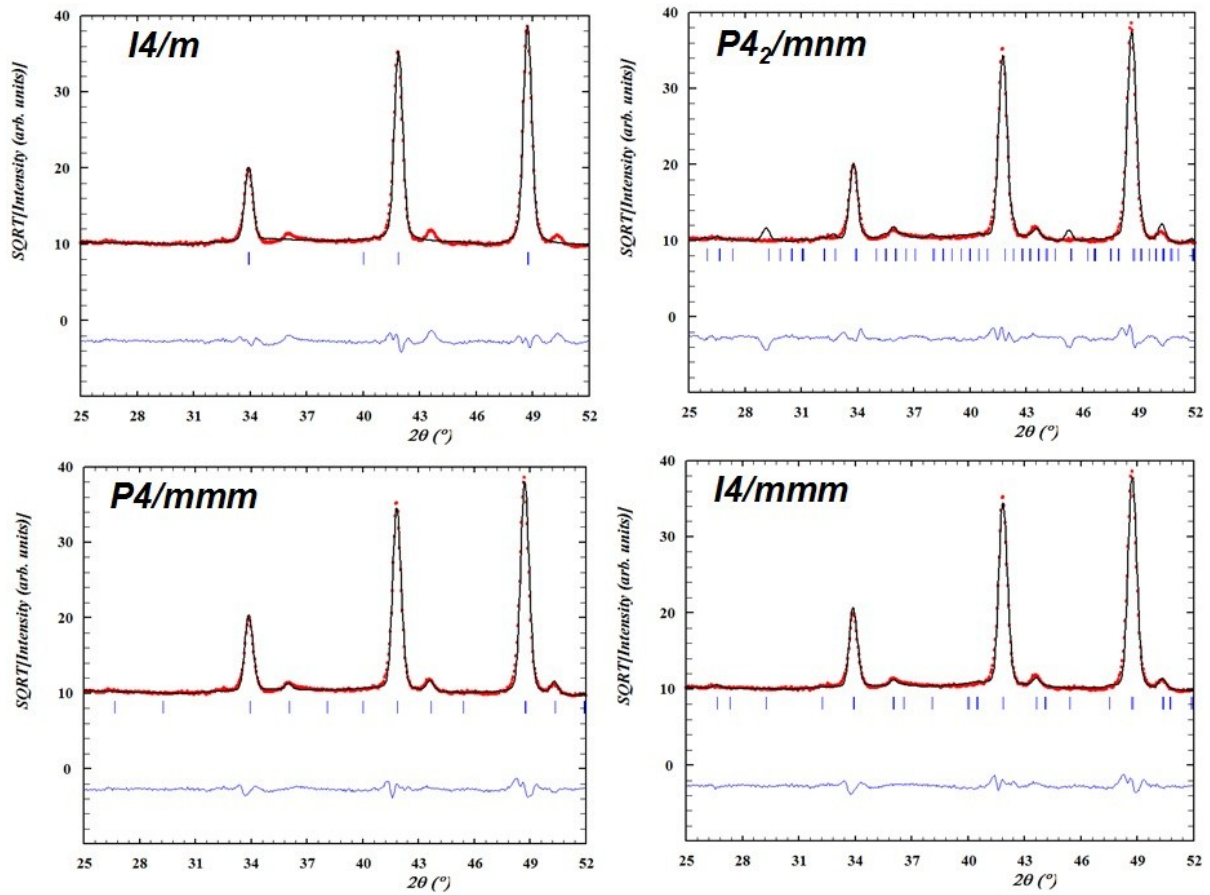

**Figure S-1.** Experimental (red dot) and calculated (thin solid line) neutron diffraction patterns at RT (D2B, ILL  $\lambda=1.594\text{\AA}$ ) for  $\text{SrFe}_{0.25}\text{Co}_{0.75}\text{O}_{2.63}$  material on a particular angular window. The vertical bars indicate calculated Bragg peak positions for nuclear structures for

- (a) Model based on  $I4/m$ ,  $a = b = a_p \sqrt{2}$  and  $c = 2 a_p$
- (b) Model based on  $P4_2/mnm$ ,  $a = b = 2 a_p \sqrt{2}$  and  $c = 4 a_p$
- (c) Model based on  $P4/mmm$ ,  $a = b = a_p$  and  $c = 2 a_p$
- (d) Model based on  $I4/mmm$ ,  $a = b = 2a_p$  and  $c = 4 a_p$

**Table S2.** The  $P4/mmm$  tetragonal SG is characteristic of the “ $\text{Sr}_2\text{B}_2\text{O}_{5.5}$ ” oxygen-vacancy ordering model.

Unit cell with lattice parameters  $a=3.86034(2) \text{ \AA} \approx a_p$ ,  $c=7.7318(1)\text{\AA} \approx 2a_p$  ( $a_p$ : lattice parameter of the cubic perovskite subcell). The agreement factors are  $\chi^2=3.36$ ,  $R_{wp}(\%)=7.01$ ,  $R_p(\%)=5.43$ ,  $R_{bragg}(\%)=11.7$  and  $R_f(\%)=12.5$ . Atomic positions, thermal factors and occupancies obtained by Rietveld refinement of the neutron powder diffractogram using the tetragonal  $P4/mmm$  space group and referring to the  $\text{Sr}_2\text{B}_2\text{O}_{5.5}$  model.

| Atom    | Wickoff position | x      | y      | z         | Biso ( $\text{\AA}^2$ ) | Occ.              |
|---------|------------------|--------|--------|-----------|-------------------------|-------------------|
| Sr1     | 2g               | 0.0000 | 0.0000 | 0.2610(3) | 1.00(3)                 | 1.00              |
| Co1/Fe1 | 1c               | 0.5    | 0.5    | 0.0000    | 0.6(1)                  | 0.740(5)/0.260(5) |
| Co2/Fe2 | 1d               | 0.5    | 0.5    | 0.5       | 0.7(1)                  | 0.760(5)/0.240(5) |
| O1      | 2h               | 0.5    | 0.5    | 0.2352(6) | 2.6(1)                  | 0.90(1)           |
| O2      | 2f               | 0.0000 | 0.5    | 0.0000    | 2.3(3)                  | 0.72(1)           |
| O3      | 2e               | 0.5    | 0.0000 | 0.5       | 0.81(4)                 | 1.0               |

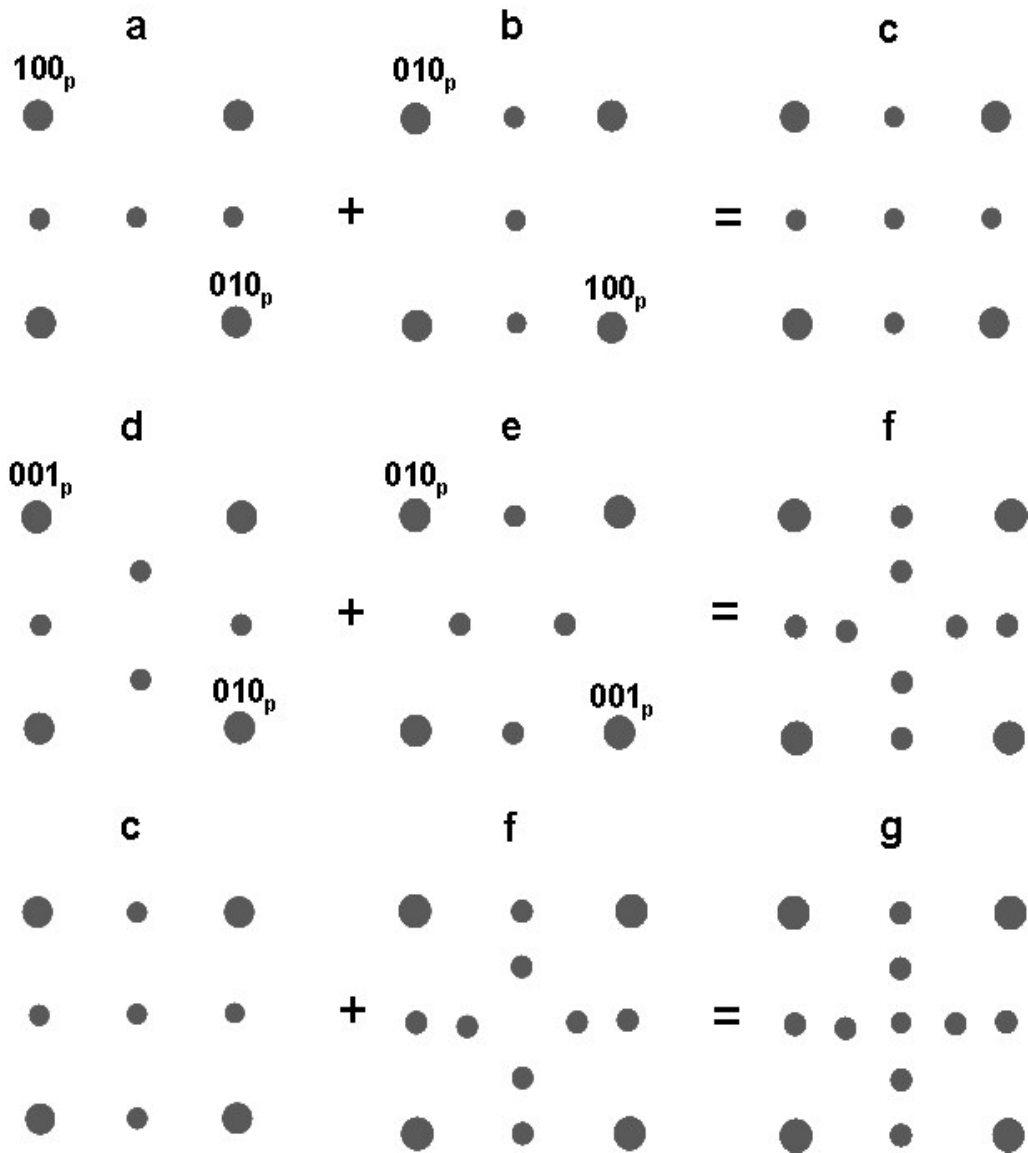

**Figure S-2.** displays schematic representations of planes of the reciprocal lattice along different zone axis and different orientations of a crystal with a  $2\sqrt{2}a_p \times 2\sqrt{2}a_p \times 4a_p$  unit cell.

The pattern represented in Fig. S2c (similar to the SAED pattern in Fig. 3a) is a combination of the patterns represented in Fig. S2a and S2b. The pattern in Fig. S2f is a combination of the patterns in Fig. S2d and S2e. The pattern represented in Fig. S2g (similar to the SAED pattern in Fig. 3b) is a combination of the patterns represented in Fig. 2c and f. According to these representations, the FFT in Fig. 3 (similar to the SAED pattern in Fig. 2b) corresponds to Fig. S2g, which indicates that the crystal is formed by four different domains with  $2\sqrt{2}a_p \times 2\sqrt{2}a_p \times 4a_p$  unit cell perpendicularly oriented. Fig. 4 shows a single domain of a crystal along the  $[100]_p$  zone axis and the FFT corresponds to Fig. S2d and the FFT in Fig. 5 (similar to the SAED pattern in Fig. 2a) correspond to the representation in Fig. S2c.
